# Supplementary material for: Effects of a Novel Thiadiazole Derivative with High Anticancer Activity on Cancer Cell Immunogenic Markers: Mismatch Repair System, PD-L1 Expression, and Tumor Mutation Burden
Source: MDPI journal article supplement (doi:10.3390/pharmaceutics13060885), 2021-06-15
Supplement: s1 [file s1]

# Supplementary Materials: Effects of a Novel Thiadiazole Derivative with High Anticancer Activity on Cancer Cell Immunogenic Markers: Mismatch Repair System, PD-L1 Expression, and Tumor Mutation Burden

Sofia Sagredou, Panagiotis Dalezis, Eirini Papadopoulou, Maria Voura, Maria V. Deligiorgi, Michail Nikolaou, Mihalis I. Panayiotidis, George Nasioulas, Vasiliki Sarli and Dimitrios T. Trafalis

## Flow Cytometric Analysis Data

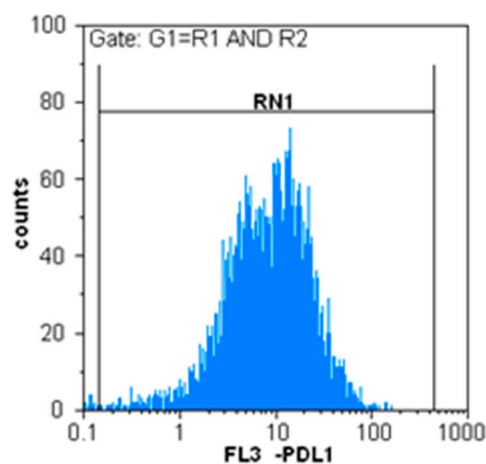

**Figure S1.** Flow cytometric analysis of PD-L1 expression on untreated DLD-1 cancer cells cultured for 48 h.

**Table S1.** Region analysis – calculations as resulted from the CyFlow® Partec Report software.

| Region | Gate   | Ungated | Count | Count/mL | %Gated | Mean-x       | CV-x%  | Mean-y | CV-y% |
|--------|--------|---------|-------|----------|--------|--------------|--------|--------|-------|
| R1     | <None> | 6730    | 6730  | -        | 65.61  | 2.37         | 65.80  | 12.13  | 47.06 |
| RN1    | G1     | 9784    | 3989  | -        | 97.34  | <b>12.92</b> | 104.62 | -      | -     |
| R2     | <None> | 4283    | 4283  | -        | 41.75  | 0.52         | 488.28 | 0.26   | 10.38 |

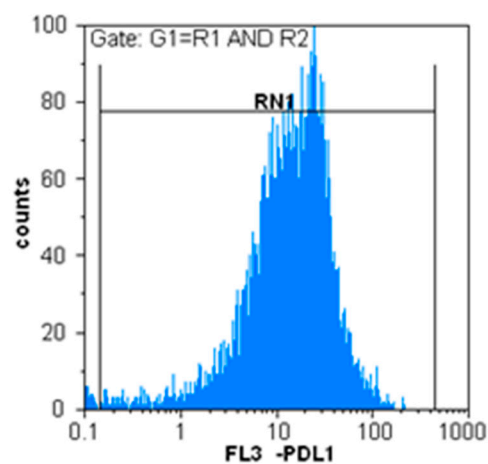

**Figure S2.** Flow cytometric analysis of PD-L1 expression on DLD-1 cancer cells treated with KA39 at IC<sub>50</sub> concentration (µM) for 48 h.

**Table S2.** Region analysis – calculations as resulted from the CyFlow® Partec Report software.

| Region | Gate   | Ungated | Count | Count/mL | %Gated | Mean-x       | CV-x%  | Mean-y | CV-y% |
|--------|--------|---------|-------|----------|--------|--------------|--------|--------|-------|
| R1     | <None> | 7320    | 7320  | -        | 62.06  | 2.99         | 68.31  | 16.15  | 40.74 |
| RN1    | G1     | 11050   | 4991  | -        | 93.69  | <b>20.14</b> | 97.27  | -      | -     |
| R2     | <None> | 5472    | 5472  | -        | 46.39  | 0.67         | 396.09 | 0.26   | 9.78  |

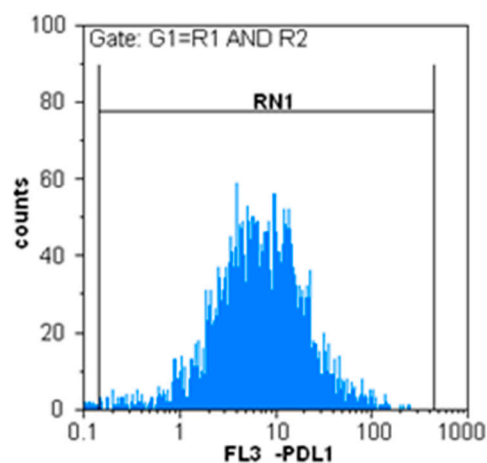

**Figure S3.** Flow cytometric analysis of PD-L1 expression on DLD-1 cancer cells treated with KA39 at IC<sub>50</sub> concentration (µM) for 72 h.

**Table S3.** Region analysis – calculations as resulted from the CyFlow® Partec Report software.

| Region | Gate   | Ungated | Count | Count/mL | %Gated | Mean-x       | CV-x%  | Mean-y | CV-y% |
|--------|--------|---------|-------|----------|--------|--------------|--------|--------|-------|
| R1     | <None> | 6798    | 6798  | -        | 66.50  | 2.04         | 71.35  | 10.39  | 44.68 |
| RN1    | G1     | 9803    | 3383  | -        | 97.05  | <b>12.30</b> | 144.61 | -      | -     |
| R2     | <None> | 3628    | 3628  | -        | 35.49  | 0.35         | 583.91 | 0.26   | 9.72  |

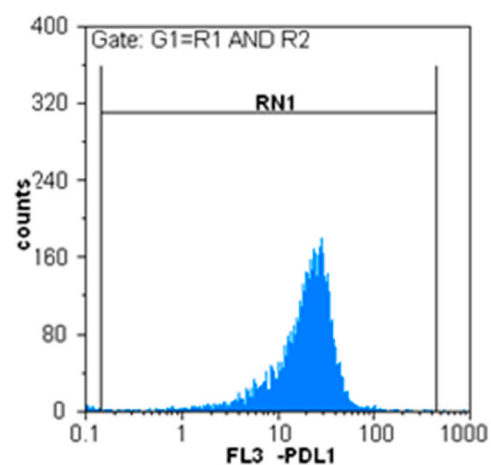

**Figure S4.** Flow cytometric analysis of PD-L1 expression on untreated DLD-1 cancer cells cultured for 72 h.

**Table S4.** Region analysis – calculations as resulted from the CyFlow® Partec Report software.

| Region | Gate   | Ungated | Count | Count/mL | %Gated | Mean-x       | CV-x%  | Mean-y | CV-y% |
|--------|--------|---------|-------|----------|--------|--------------|--------|--------|-------|
| R1     | <None> | 11511   | 11511 | -        | 55.75  | 3.21         | 64.50  | 18.92  | 42.29 |
| RN1    | G1     | 19656   | 5599  | -        | 97.14  | <b>23.19</b> | 75.96  | -      | -     |
| R2     | <None> | 6010    | 6010  | -        | 29.11  | 2.14         | 267.75 | 0.28   | 10.09 |

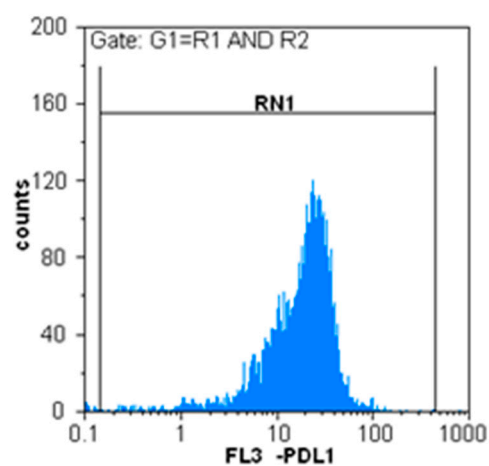

**Figure S5.** Flow cytometric analysis of PD-L1 expression on DLD-1 cancer cells treated with KA39 at TGI concentration ( $\mu$ M) for 72 h.

**Table S5.** Region analysis – calculations as resulted from the CyFlow® Partec Report software.

| Region | Gate   | Ungated | Count | Count/mL | %Gated | Mean-x       | CV-x%  | Mean-y | CV-y% |
|--------|--------|---------|-------|----------|--------|--------------|--------|--------|-------|
| R1     | <None> | 8954    | 8954  | -        | 44.08  | 2.85         | 56.68  | 17.68  | 39.68 |
| RN1    | G1     | 19308   | 4172  | -        | 97.20  | <b>22.27</b> | 77.37  | -      | -     |
| R2     | <None> | 4711    | 4711  | -        | 23.19  | 1.39         | 328.99 | 0.28   | 9.77  |

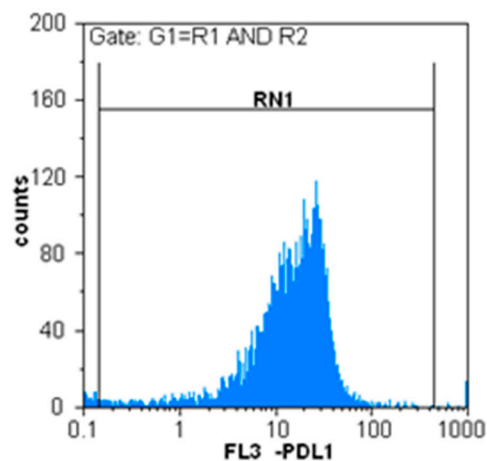

**Figure S6.** Flow cytometric analysis of PD-L1 expression on untreated HT-29 cancer cells cultured for 48 h.

**Table S6.** Region analysis – calculations as resulted from the CyFlow® Partec Report software.

| Region | Gate   | Ungated | Count | Count/mL | %Gated | Mean-x       | CV-x%  | Mean-y | CV-y% |
|--------|--------|---------|-------|----------|--------|--------------|--------|--------|-------|
| R1     | <None> | 7454    | 7454  | -        | 72.54  | 3.21         | 58.94  | 16.89  | 40.95 |
| RN1    | G1     | 9513    | 4681  | -        | 91.03  | <b>19.56</b> | 104.78 | -      | -     |
| R2     | <None> | 5277    | 5277  | -        | 51.35  | 1.05         | 364.10 | 0.26   | 10.61 |

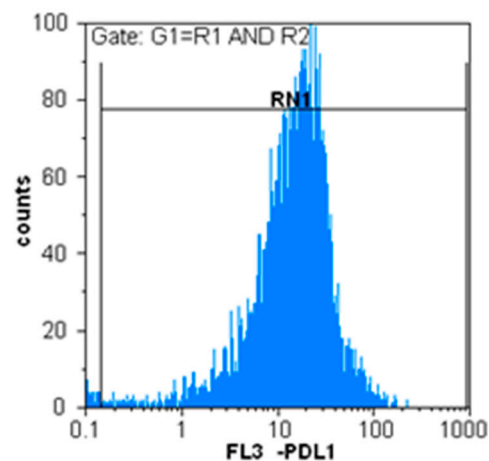

**Figure S7.** Flow cytometric analysis of PD-L1 expression on HT-29 cancer cells treated with KA39 at IC<sub>50</sub> concentration (μM) for 48 h.

**Table S7.** Region analysis – calculations as resulted from the CyFlow® Partec Report software.

| Region | Gate   | Ungated | Count | Count/mL | %Gated | Mean-x       | CV-x%  | Mean-y | CV-y% |
|--------|--------|---------|-------|----------|--------|--------------|--------|--------|-------|
| R1     | <None> | 7237    | 7237  | -        | 69.64  | 4.31         | 59.31  | 15.58  | 40.30 |
| RN1    | G1     | 9855    | 4524  | -        | 93.88  | <b>20.13</b> | 92.52  | -      | -     |
| R2     | <None> | 4908    | 4908  | -        | 47.23  | 0.61         | 424.39 | 0.26   | 9.36  |

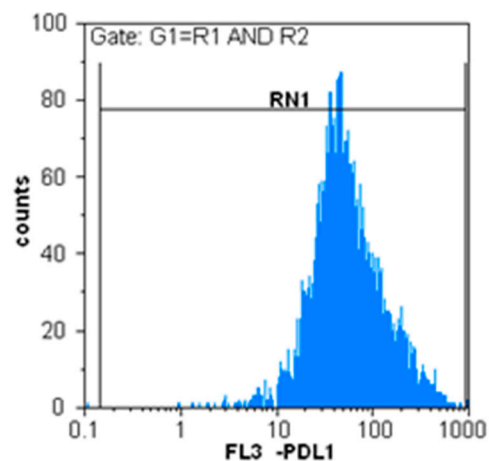

**Figure S8.** Flow cytometric analysis of PD-L1 expression on HT-29 cancer cells treated with KA39 at IC<sub>50</sub> concentration ( $\mu$ M) for 72 h.

**Table S8.** Region analysis – calculations as resulted from the CyFlow® Partec Report software.

| Region | Gate   | Ungated | Count | Count/mL | %Gated | Mean-x       | CV-x%  | Mean-y | CV-y% |
|--------|--------|---------|-------|----------|--------|--------------|--------|--------|-------|
| R1     | <None> | 6746    | 6746  | -        | 64.78  | 7.51         | 62.31  | 13.81  | 39.76 |
| RN1    | G1     | 10280   | 3698  | -        | 99.76  | <b>80.82</b> | 108.17 | -      | -     |
| R2     | <None> | 3752    | 3752  | -        | 36.03  | 0.71         | 513.16 | 0.25   | 8.38  |

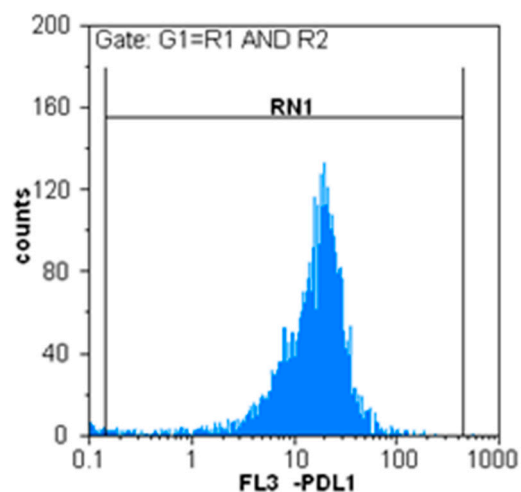

**Figure S9.** Flow cytometric analysis of PD-L1 expression on untreated HT-29 cancer cells cultured for 72 h.

**Table S9.** Region analysis – calculations as resulted from the CyFlow® Partec Report software.

| Region | Gate   | Ungated | Count | Count/mL | %Gated | Mean-x       | CV-x%  | Mean-y | CV-y% |
|--------|--------|---------|-------|----------|--------|--------------|--------|--------|-------|
| R1     | <None> | 10905   | 10905 | -        | 53.67  | 3.14         | 51.40  | 16.50  | 35.98 |
| RN1    | G1     | 19242   | 4057  | -        | 95.28  | <b>19.40</b> | 75.77  | -      | -     |
| R2     | <None> | 4516    | 4516  | -        | 22.22  | 0.93         | 361.94 | 0.27   | 8.62  |

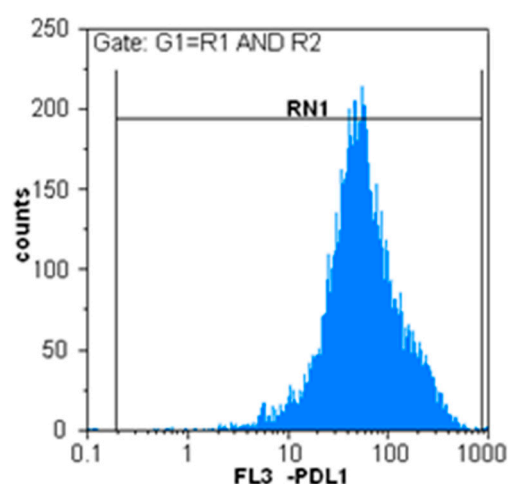

**Figure S10.** Flow cytometric analysis of PD-L1 expression on HT-29 cancer cells treated with KA39 at TGI concentration ( $\mu\text{M}$ ) for 72 h.

**Table S10.** Region analysis – calculations as resulted from the CyFlow® Partec Report software.

| Region | Gate   | Ungated | Count | Count/mL | %Gated | Mean-x       | CV-x%  | Mean-y | CV-y% |
|--------|--------|---------|-------|----------|--------|--------------|--------|--------|-------|
| R1     | <None> | 15069   | 15069 | -        | 59.69  | 6.62         | 51.50  | 13.82  | 35.37 |
| RN1    | G1     | 24557   | 9083  | -        | 99.67  | <b>78.56</b> | 95.78  | -      | -     |
| R2     | <None> | 9409    | 9409  | -        | 37.27  | 0.38         | 507.46 | 0.25   | 8.12  |

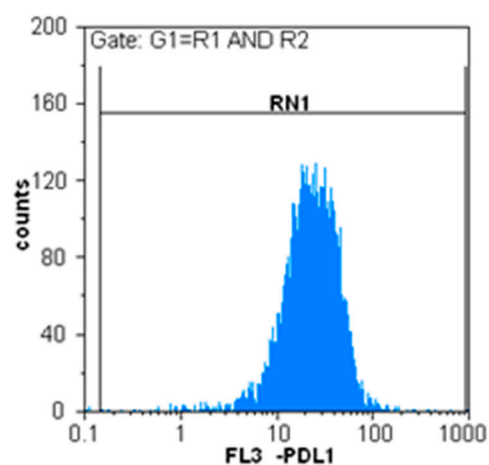

**Figure S11.** Flow cytometric analysis of PD-L1 expression on untreated DU-145 cancer cells cultured for 48 h.

**Table S11.** Region analysis – calculations as resulted from the CyFlow® Partec Report software.

| Region | Gate   | Ungated | Count | Count/mL | %Gated | Mean-x       | CV-x%  | Mean-y | CV-y% |
|--------|--------|---------|-------|----------|--------|--------------|--------|--------|-------|
| R1     | <None> | 6999    | 6999  | -        | 68.60  | 3.68         | 55.48  | 18.82  | 36.42 |
| RN1    | G1     | 9957    | 5387  | -        | 99.57  | <b>27.99</b> | 79.41  | -      | -     |
| R2     | <None> | 5591    | 5591  | -        | 54.80  | 1.08         | 403.67 | 0.26   | 10.67 |

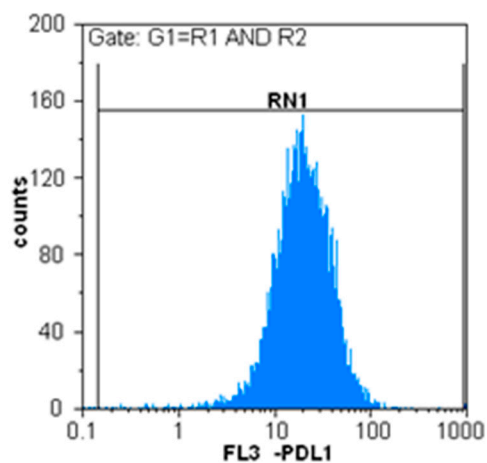

**Figure S12.** Flow cytometric analysis of PD-L1 expression on DU-145 cancer cells treated with KA39 at IC<sub>50</sub> concentration (μM) for 48 h.

**Table S12.** Region analysis – calculations as resulted from the CyFlow® Partec Report software.

| Region | Gate   | Ungated | Count | Count/mL | %Gated | Mean-x       | CV-x%  | Mean-y | CV-y% |
|--------|--------|---------|-------|----------|--------|--------------|--------|--------|-------|
| R1     | <None> | 7513    | 7513  | -        | 71.72  | 3.43         | 49.02  | 18.89  | 32.36 |
| RN1    | G1     | 10201   | 6007  | -        | 99.29  | <b>24.48</b> | 77.58  | -      | -     |
| R2     | <None> | 6175    | 6175  | -        | 58.95  | 0.75         | 419.37 | 0.26   | 9.44  |

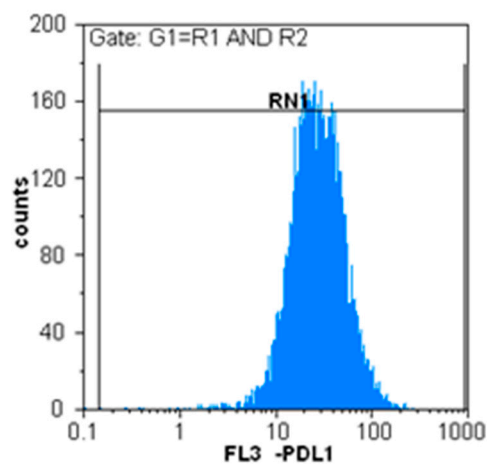

**Figure S13.** Flow cytometric analysis of PD-L1 expression on DU-145 cancer cells treated with KA39 at IC<sub>50</sub> concentration (μM) for 72 h.

**Table S13.** Region analysis – calculations as resulted from the CyFlow® Partec Report software.

| Region | Gate   | Ungated | Count | Count/mL | %Gated | Mean-x       | CV-x%  | Mean-y | CV-y% |
|--------|--------|---------|-------|----------|--------|--------------|--------|--------|-------|
| R1     | <None> | 8257    | 8257  | -        | 75.15  | 5.15         | 55.46  | 21.17  | 35.94 |
| RN1    | G1     | 10802   | 7069  | -        | 99.80  | <b>33.55</b> | 69.66  | -      | -     |
| R2     | <None> | 7199    | 7199  | -        | 65.52  | 1.50         | 387.07 | 0.27   | 11.54 |

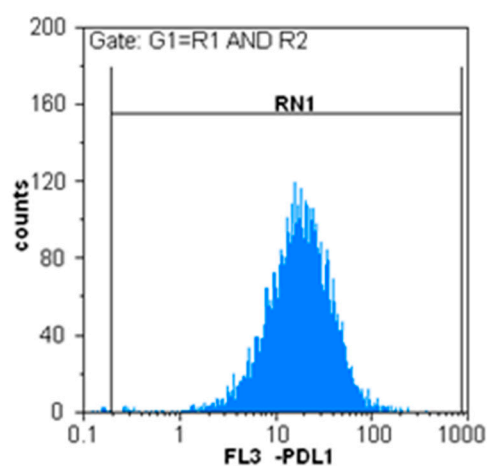

**Figure S14.** Flow cytometric analysis of PD-L1 expression on untreated DU-145 cancer cells cultured for 72 h.

**Table S14.** Region analysis – calculations as resulted from the CyFlow® Partec Report software.

| Region | Gate   | Ungated | Count | Count/mL | %Gated | Mean-x       | CV-x%  | Mean-y | CV-y% |
|--------|--------|---------|-------|----------|--------|--------------|--------|--------|-------|
| R1     | <None> | 6907    | 6907  | -        | 34.03  | 3.59         | 61.76  | 16.72  | 39.44 |
| RN1    | G1     | 19285   | 5088  | -        | 99.10  | <b>23.46</b> | 86.03  | -      | -     |
| R2     | <None> | 5726    | 5726  | -        | 28.21  | 0.74         | 444.21 | 0.26   | 9.41  |

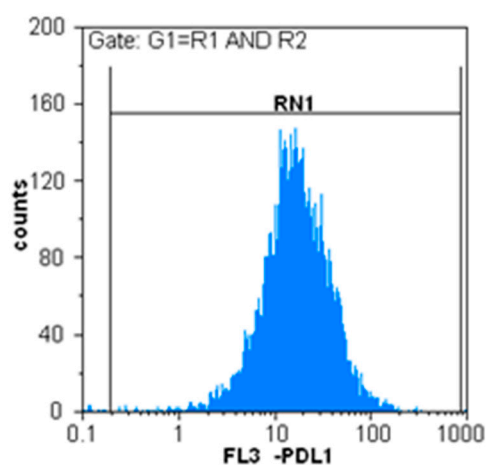

**Figure S15.** Flow cytometric analysis of PD-L1 expression on DU-145 cancer cells treated with KA39 at TGI concentration ( $\mu$ M) for 72 h.

**Table S15.** Region analysis – calculations as resulted from the CyFlow® Partec Report software.

| Region | Gate   | Ungated | Count | Count/mL | %Gated | Mean-x       | CV-x%  | Mean-y | CV-y% |
|--------|--------|---------|-------|----------|--------|--------------|--------|--------|-------|
| R1     | <None> | 8572    | 8572  | -        | 42.07  | 3.65         | 65.18  | 18.34  | 41.79 |
| RN1    | G1     | 19546   | 6736  | -        | 99.44  | <b>23.02</b> | 94.70  | -      | -     |
| R2     | <None> | 7311    | 7311  | -        | 35.88  | 1.18         | 405.80 | 0.26   | 9.86  |



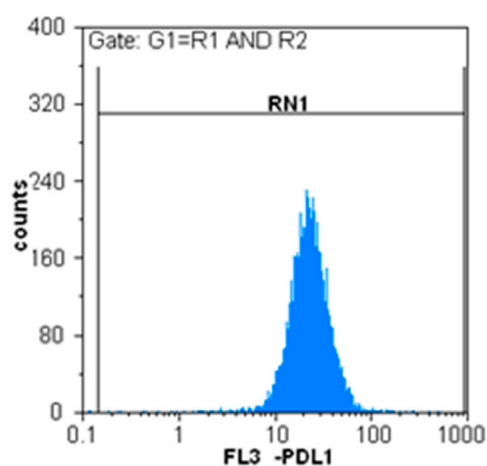

**Figure S16.** Flow cytometric analysis of PD-L1 expression on untreated PC-3 cancer cells cultured for 48 h.

**Table S16.** Region analysis – calculations as resulted from the CyFlow® Partec Report software.

| Region | Gate   | Ungated | Count | Count/mL | %Gated | Mean-x       | CV-x%  | Mean-y | CV-y% |
|--------|--------|---------|-------|----------|--------|--------------|--------|--------|-------|
| R1     | <None> | 8410    | 8410  | -        | 81.44  | 3.17         | 55.75  | 16.59  | 32.58 |
| RN1    | G1     | 10263   | 6134  | -        | 99.89  | <b>25.91</b> | 64.58  | -      | -     |
| R2     | <None> | 6212    | 6212  | -        | 60.16  | 0.35         | 521.31 | 0.25   | 6.99  |

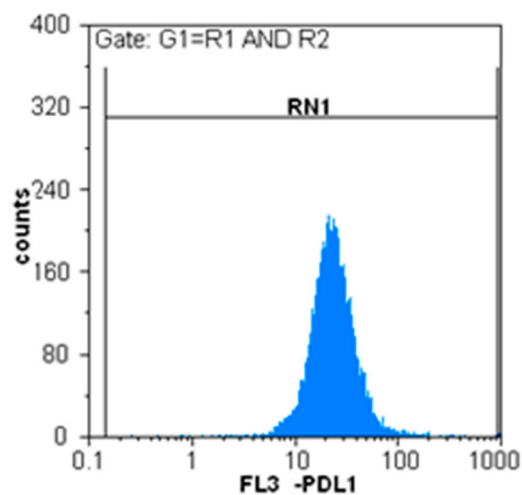

**Figure S17.** Flow cytometric analysis of PD-L1 expression on PC-3 cancer cells treated with KA39 at IC<sub>50</sub> concentration (µM) for 48 h.

**Table S17.** Region analysis – calculations as resulted from the CyFlow® Partec Report software.

| Region | Gate   | Ungated | Count | Count/mL | %Gated | Mean-x       | CV-x%  | Mean-y | CV-y% |
|--------|--------|---------|-------|----------|--------|--------------|--------|--------|-------|
| R1     | <None> | 8404    | 8404  | -        | 80.95  | 4.19         | 61.38  | 17.63  | 34.04 |
| RN1    | G1     | 10257   | 6087  | -        | 99.90  | <b>27.66</b> | 83.06  | -      | -     |
| R2     | <None> | 6169    | 6169  | -        | 59.42  | 0.42         | 444.45 | 0.25   | 7.22  |

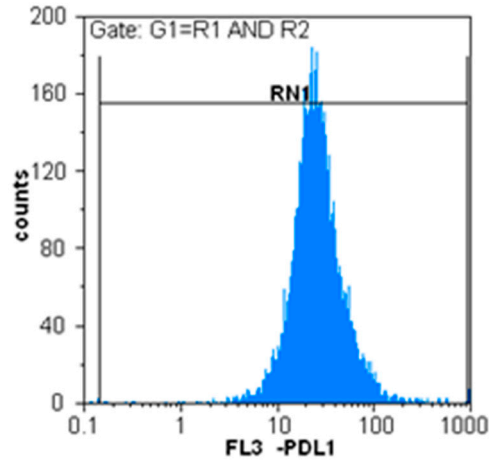

**Figure S18.** Flow cytometric analysis of PD-L1 expression on PC-3 cancer cells treated with KA39 at IC<sub>50</sub> concentration (μM) for 72 h.

**Table S18.** Region analysis – calculations as resulted from the CyFlow® Partec Report software.

| Region | Gate   | Ungated | Count | Count/mL | %Gated | Mean-x       | CV-x%  | Mean-y | CV-y% |
|--------|--------|---------|-------|----------|--------|--------------|--------|--------|-------|
| R1     | <None> | 8381    | 8381  | -        | 80.02  | 6.37         | 53.97  | 16.00  | 36.76 |
| RN1    | G1     | 10305   | 5663  | -        | 99.68  | <b>32.98</b> | 108.90 | -      | -     |
| R2     | <None> | 5751    | 5751  | -        | 54.91  | 0.34         | 475.01 | 0.25   | 7.03  |

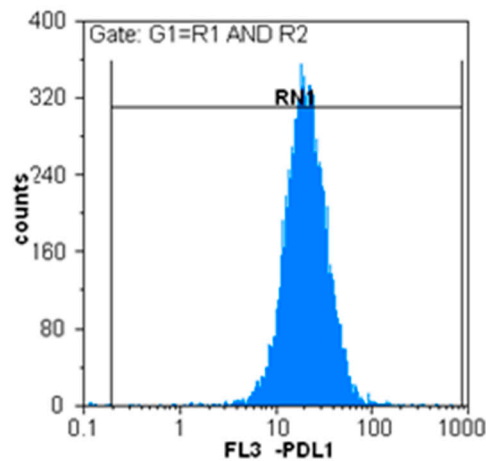

**Figure S19.** Flow cytometric analysis of PD-L1 expression on untreated PC-3 cancer cells cultured for 72 h.

**Table S19.** Region analysis – calculations as resulted from the CyFlow® Partec Report software.

| Region | Gate   | Ungated | Count | Count/mL | %Gated | Mean-x       | CV-x%  | Mean-y | CV-y% |
|--------|--------|---------|-------|----------|--------|--------------|--------|--------|-------|
| R1     | <None> | 14475   | 14475 | -        | 61.79  | 3.23         | 47.03  | 17.16  | 27.35 |
| RN1    | G1     | 22965   | 10842 | -        | 99.83  | <b>23.93</b> | 69.66  | -      | -     |
| R2     | <None> | 11321   | 11321 | -        | 48.33  | 0.33         | 460.49 | 0.25   | 6.47  |

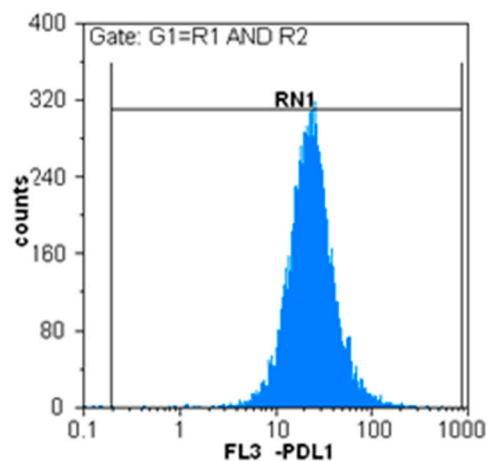

**Figure S20.** Flow cytometric analysis of PD-L1 expression on PC-3 cancer cells treated with KA39 at TGI concentration ( $\mu\text{M}$ ) for 72 h.

**Table S20.** Region analysis – calculations as resulted from the CyFlow® Partec Report software.

| Region | Gate   | Ungated | Count | Count/mL | %Gated | Mean-x       | CV-x%  | Mean-y | CV-y% |
|--------|--------|---------|-------|----------|--------|--------------|--------|--------|-------|
| R1     | <None> | 12827   | 12827 | -        | 61.02  | 5.46         | 51.65  | 17.35  | 33.49 |
| RN1    | G1     | 20598   | 9903  | -        | 99.84  | <b>28.21</b> | 74.87  | -      | -     |
| R2     | <None> | 10297   | 10297 | -        | 48.98  | 0.36         | 469.83 | 0.26   | 7.40  |

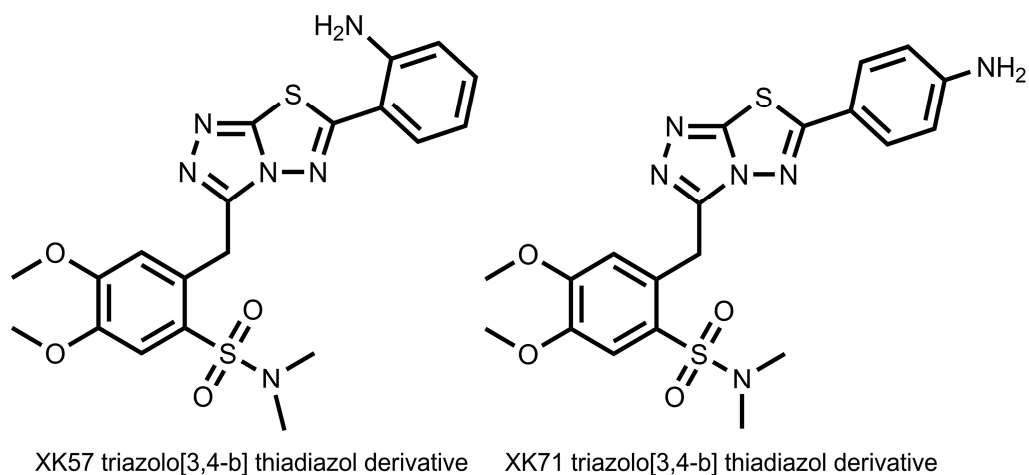

**Figure S21.** Chemical structures of XK 57: 2-((6-(2-aminophenyl)-[1,2,4]triazolo[3,4-b][1,3,4]thiadiazol-3-yl)methyl)-4,5-dimethoxy-*N,N*-dimethylbenzenesulfonamide and XK 71: 2-((6-(4-aminophenyl)-[1,2,4]triazolo[3,4-b][1,3,4]thiadiazol-3-yl)methyl)-4,5-dimethoxy-*N,N*-dimethylbenzenesulfonamide.

**Table S21.** Cytostatic (GI<sub>50</sub>, TGI) and cytotoxic effects (IC<sub>50</sub>) induced by XK57 and XK71 on the tested human cancer cell lines, DLD-1, HT-29, LS174T, DU-145 and PC-3.

| Cancer Cell Lines | XK57 GI <sub>50</sub> | XK57 TGI     | XK57 IC <sub>50</sub> | XK71 GI <sub>50</sub> | XK71 TGI     | XK71 IC <sub>50</sub> |
|-------------------|-----------------------|--------------|-----------------------|-----------------------|--------------|-----------------------|
| DLD-1             | 90 $\mu$ M            | >100 $\mu$ M | >100 $\mu$ M          | >100 $\mu$ M          | >100 $\mu$ M | >100 $\mu$ M          |
| HT-29             | >100 $\mu$ M          | >100 $\mu$ M | >100 $\mu$ M          | >100 $\mu$ M          | >100 $\mu$ M | >100 $\mu$ M          |
| LS174T            | >100 $\mu$ M          | >100 $\mu$ M | >100 $\mu$ M          | >100 $\mu$ M          | >100 $\mu$ M | >100 $\mu$ M          |
| DU-145            | >100 $\mu$ M          | >100 $\mu$ M | >100 $\mu$ M          | >100 $\mu$ M          | >100 $\mu$ M | >100 $\mu$ M          |
| PC-3              | >100 $\mu$ M          | >100 $\mu$ M | >100 $\mu$ M          | >100 $\mu$ M          | >100 $\mu$ M | >100 $\mu$ M          |

**Table S22.** The absolute values of PD-L1 expression as defined by flow cytometric analysis in untreated (control) and treated cells with XK57 derivative at IC<sub>50</sub> concentration ( $\mu$ M) for 48 and 72 h, as well as at TGI concentration ( $\mu$ M) for 72 h. The units of measurements are expressed as mean of immuno-fluorescence intensity counted per cell.

| Cancer cell lines | PD-L1 Expression |                            |                            |                  |                  |
|-------------------|------------------|----------------------------|----------------------------|------------------|------------------|
|                   | Control 48 h     | XK57 IC <sub>50</sub> 48 h | XK57 IC <sub>50</sub> 72 h | Control 72 h     | XK57 TGI 72 h    |
| DLD-1             | 16.89 $\pm$ 0.84 | 19.88 $\pm$ 0.99           | 15.77 $\pm$ 0.94           | 25.09 $\pm$ 1.25 | 26.54 $\pm$ 1.59 |
| HT-29             | 23.34 $\pm$ 1.4  | 24.79 $\pm$ 1.98           | 26.34 $\pm$ 1.31           | 21.23 $\pm$ 2.12 | 23.19 $\pm$ 1.62 |
| DU-145            | 28.89 $\pm$ 2.02 | 27.19 $\pm$ 2.17           | 32.09 $\pm$ 2.24           | 24.56 $\pm$ 1.96 | 25.18 $\pm$ 1.25 |
| PC-3              | 27.14 $\pm$ 2.44 | 28.44 $\pm$ 1.42           | 29.08 $\pm$ 2.03           | 27.88 $\pm$ 1.39 | 29.67 $\pm$ 2.07 |

**Table S23.** The absolute values of PD-L1 expression as defined by flow cytometric analysis in untreated (control) and treated cells with XK71 derivative at IC<sub>50</sub> concentration ( $\mu$ M) for 48 and 72 h, as well as at TGI concentration ( $\mu$ M) for 72 h. The units of measurements are expressed as mean of immuno-fluorescence intensity counted per cell.

| Cancer cell lines | PD-L1 expression |                            |                            |                  |                  |
|-------------------|------------------|----------------------------|----------------------------|------------------|------------------|
|                   | Control 48 h     | XK71 IC <sub>50</sub> 48 h | XK71 IC <sub>50</sub> 72 h | Control 72 h     | XK71 TGI 72 h    |
| DLD-1             | 14.09 $\pm$ 0.7  | 17.45 $\pm$ 1.04           | 13.43 $\pm$ 0.67           | 22.81 $\pm$ 1.14 | 21.19 $\pm$ 1.05 |
| HT-29             | 22.78 $\pm$ 1.36 | 21.31 $\pm$ 1.06           | 27.32 $\pm$ 1.63           | 20.59 $\pm$ 1.23 | 24.64 $\pm$ 1.47 |
| DU-145            | 25.35 $\pm$ 1.26 | 27.53 $\pm$ 1.65           | 28.77 $\pm$ 2.01           | 26.89 $\pm$ 2.15 | 25.04 $\pm$ 1.75 |
| PC-3              | 28.19 $\pm$ 1.97 | 30.98 $\pm$ 2.78           | 26.19 $\pm$ 1.83           | 25.12 $\pm$ 1.75 | 27.23 $\pm$ 2.17 |

**MSI analysis in DLD-1, HT-29, DU-145, PC-3 and LS174T cancer cells treated with XK71 and XK57 derivatives**

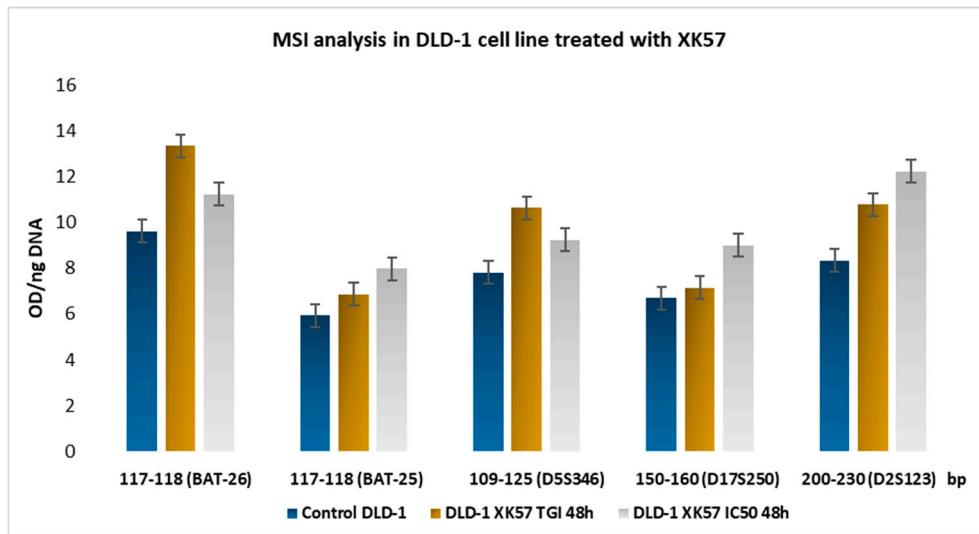

(A)

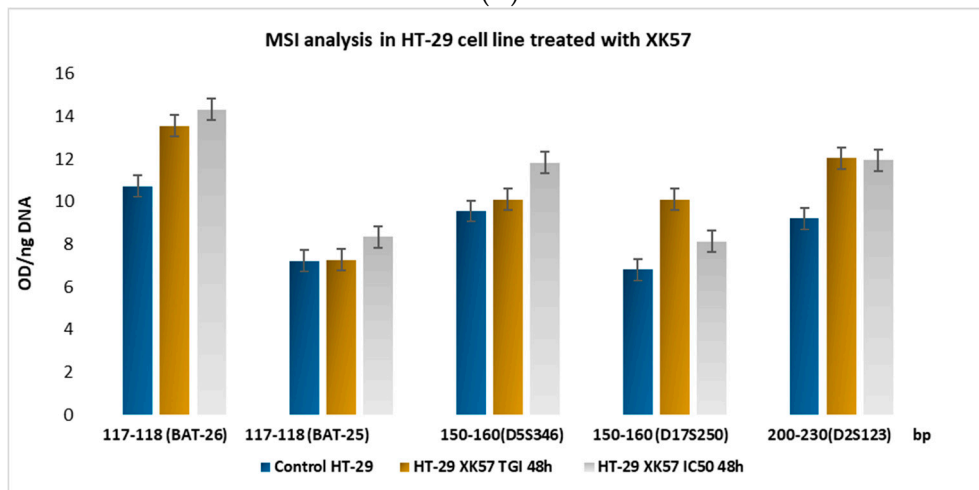

(B)

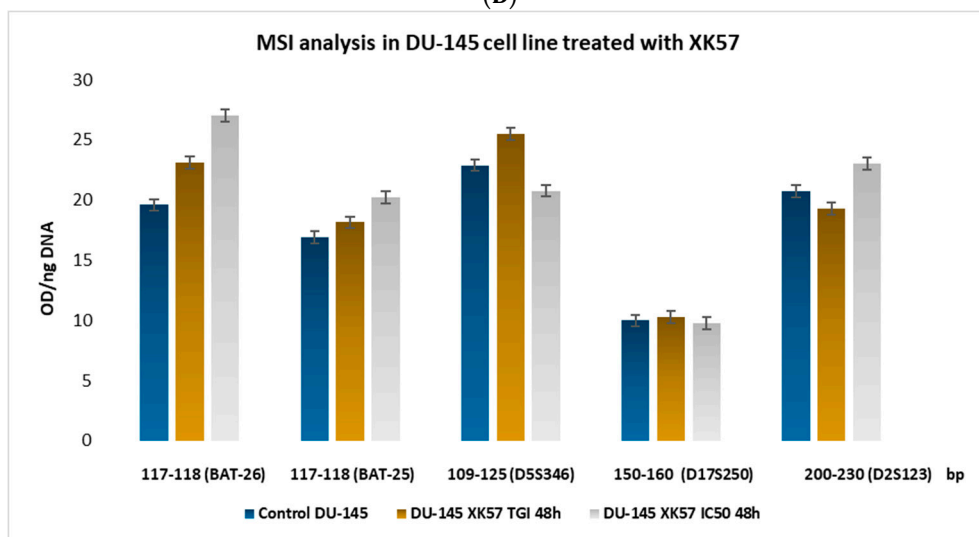

(C)

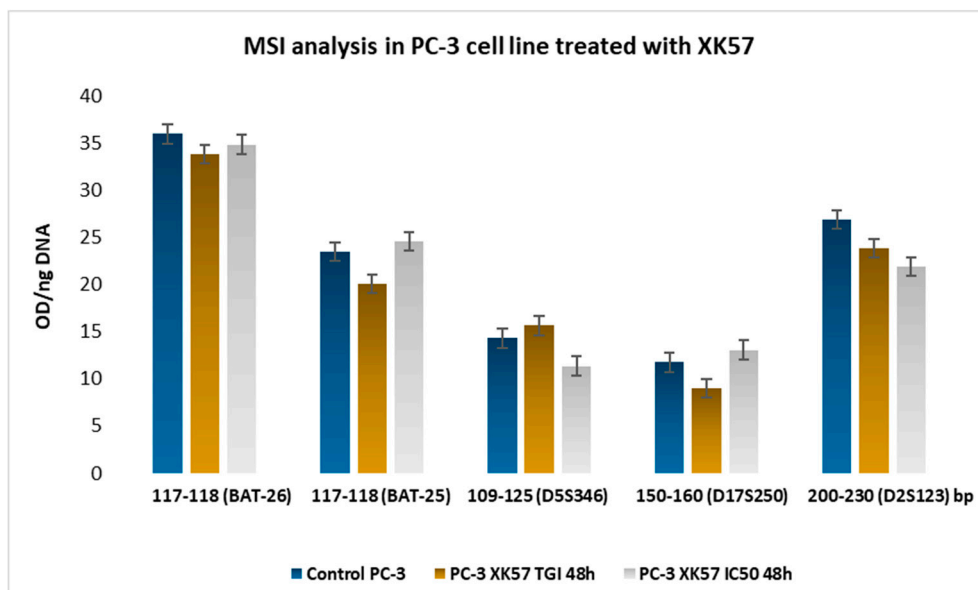

(D)

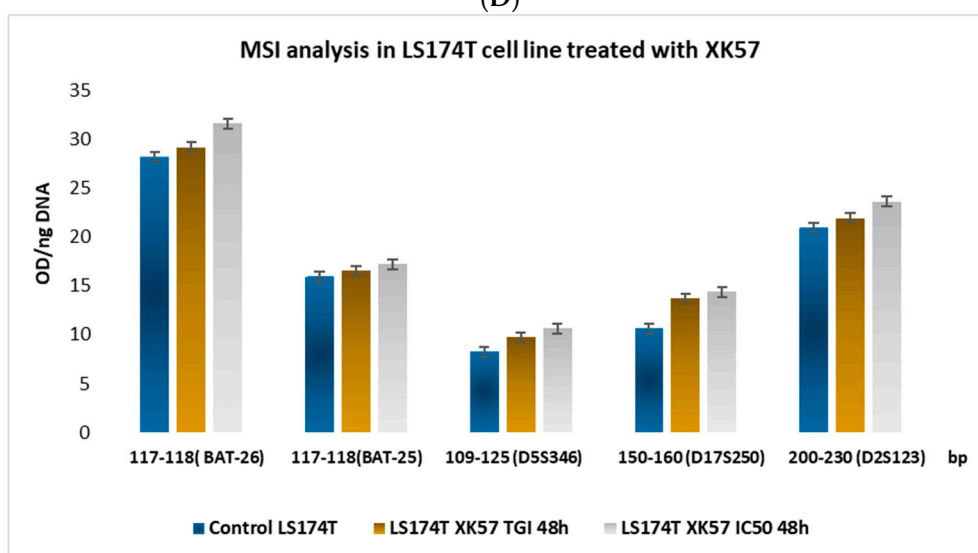

(E)

**Figure S22.** MSI alterations (mean  $\pm$  SEM) induced by XK57 triazolo[3,4-b]thiadiazole derivative (per ng DNA) in five human cancer cell lines. (A), (B), (C), (D) and (E) demonstrate the MSI alterations in DLD-1, HT-29, DU-145, PC-3, and LS174T cancer cells, treated with XK57 at the TGI concentration and IC<sub>50</sub> ( $\mu$ M) for 48h, respectively. Quantitative MSI fragments analysis conducted in Bethesda panel (BAT-26, BAT-25, D5S346, D17S250 and D2S123). Student t-test;  $p > 0.01$ ; no statistical significance level.

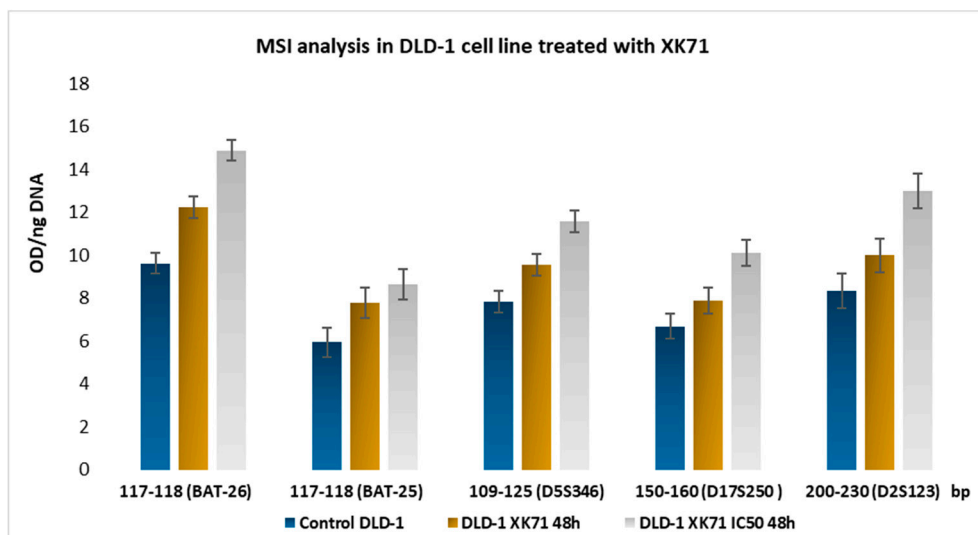

(A)

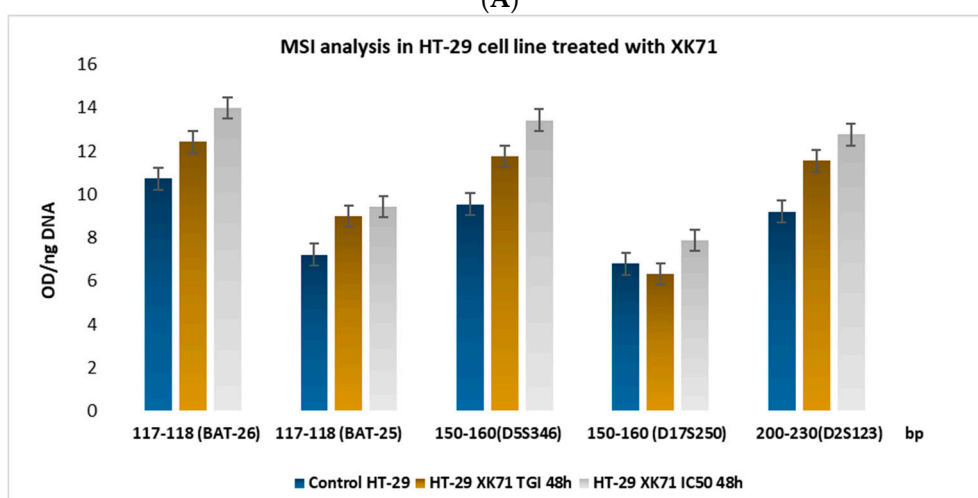

(B)

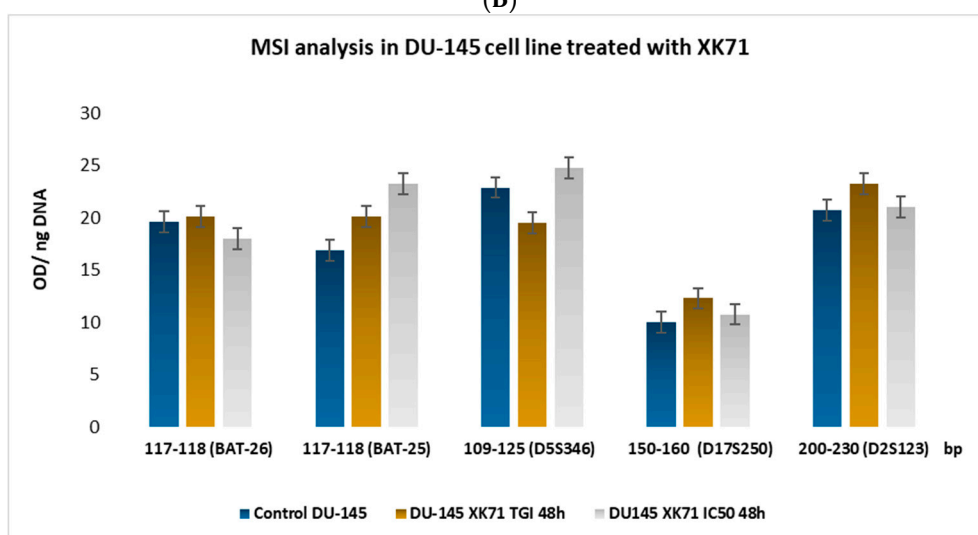

(C)

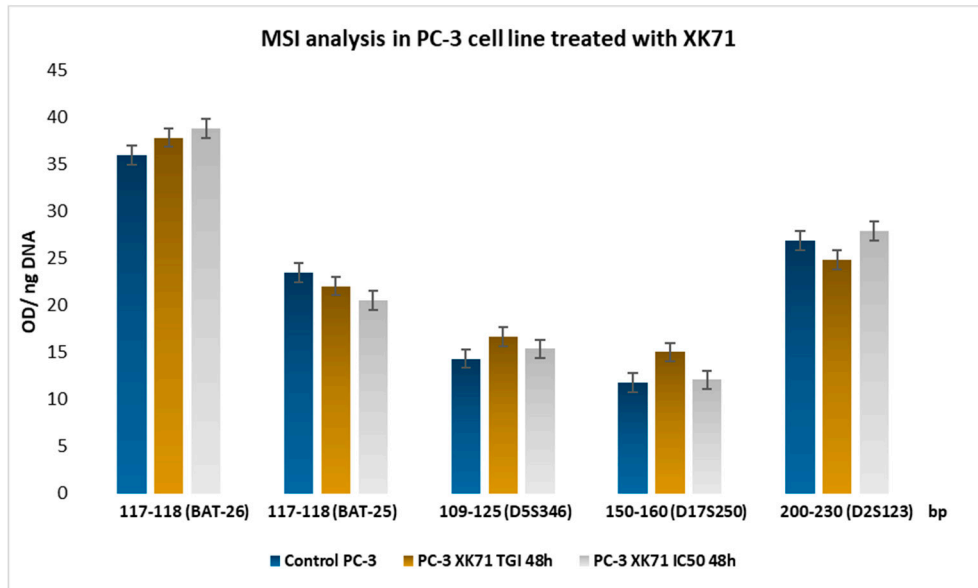

(D)

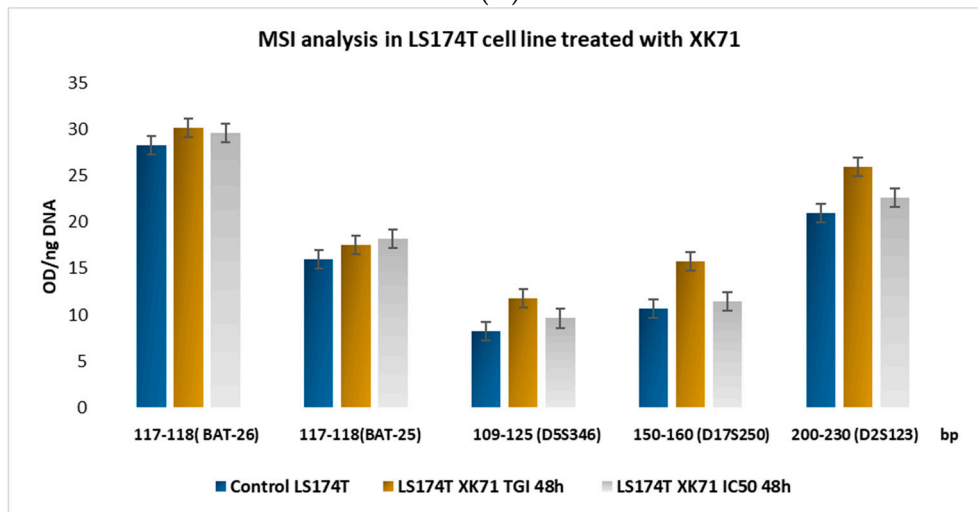

(E)

**Figure S23.** MSI alterations (mean  $\pm$  SEM) induced by XK71 triazolo[3,4-*b*]thiadiazole derivative (per ng DNA) in five human cancer cell lines. (A), (B), (C), (D) and (E) show the MSI alterations in DLD-1, HT-29, DU-145, PC-3, and LS174T cancer cells, treated with XK71 at the TGI concentration and IC<sub>50</sub> ( $\mu$ M) for 48h, respectively. Quantitative MSI fragments analysis conducted in Bethesda panel (BAT-26, BAT-25, D5S346, D17S250 and D2S123). Student t-test;  $p > 0.01$ ; no statistical significance level.
